# Supplementary material
Source: PubMed Central journal article supplement (PMC2812433)
Supplement: NIHMS169756-supplement-Suppl_Table_1.pdf [file NIHMS169756-supplement-Suppl_Table_1.pdf]

Table S1, Roth et al. 2002

| Men Before-ST | Women Before-ST | Before-ST Ratio | Acc#     | Gene                                                                                  | Men After-ST | Women After-ST | After-ST Ratio |
|---------------|-----------------|-----------------|----------|---------------------------------------------------------------------------------------|--------------|----------------|----------------|
| 0.907         | 0.056           | 0.062           | AA456636 | RAN, member RAS oncogene family                                                       | 1.025        | 0.492          | 0.480          |
| 0.832         | 0.055           | 0.066           | H54289   | Golgi vesicular membrane trafficking protein p18                                      | 0.849        | 0.480          | 0.566          |
| 3.463         | 0.259           | 0.075           | N32201   | osteomodulin                                                                          | 2.864        | 1.289          | 0.450          |
| 0.447         | 0.041           | 0.091           | H70775   | ESTs                                                                                  | 0.455        | 0.246          | 0.541          |
| 1.235         | 0.127           | 0.103           | R38619   | fucose-1-phosphate guanylyltransferase                                                | 1.517        | 0.683          | 0.450          |
| 0.560         | 0.060           | 0.107           | AA447793 | H.sapiens mRNA for pur alpha extended 3'untranslated region                           | 0.511        | 0.294          | 0.575          |
| 1.082         | 0.118           | 0.109           | R92994   | matrix metalloproteinase 12 (macrophage elastase)                                     | 1.120        | 0.656          | 0.585          |
| 1.881         | 0.206           | 0.109           | AA598561 | CD164 antigen, sialomucin                                                             | 1.885        | 0.894          | 0.474          |
| 0.426         | 0.048           | 0.113           | N53031   | UDP glycosyltransferase 2 family, polypeptide B4                                      | 0.411        | 0.240          | 0.583          |
| 0.389         | 0.044           | 0.114           | AA418524 | phospholipase D2                                                                      | 0.327        | 0.180          | 0.550          |
| 0.691         | 0.083           | 0.121           | W72437   | general transcription factor IIIH, polypeptide 2 (44kD subunit)                       | 0.649        | 0.373          | 0.575          |
| 0.574         | 0.070           | 0.121           | H95088   | poly (ADP-ribose) glycohydrolase                                                      | 0.555        | 0.298          | 0.538          |
| 1.685         | 0.226           | 0.134           | AA171449 | biphenylhydrolase-like (serine hydrolase; breast epithelial mucin-associated antigen) | 1.772        | 0.900          | 0.508          |
| 0.449         | 0.061           | 0.135           | N81076   | far upstream element (FUSE) binding protein 3                                         | 0.417        | 0.223          | 0.534          |
| 0.992         | 0.135           | 0.136           | AA496149 | 3-hydroxy-3-methylglutaryl-Coenzyme A synthase 2 (mitochondrial)                      | 1.051        | 0.569          | 0.541          |
| 0.691         | 0.096           | 0.140           | AA416783 | H-2K binding factor-2                                                                 | 0.718        | 0.322          | 0.448          |
| 0.571         | 0.080           | 0.140           | H97488   | N-ethylmaleimide-sensitive factor                                                     | 0.538        | 0.225          | 0.418          |
| 1.116         | 0.158           | 0.141           | H79779   | histone deacetylase 3                                                                 | 1.054        | 0.455          | 0.432          |
| 1.008         | 0.145           | 0.144           | H84871   | Ste-20 related kinase                                                                 | 1.050        | 0.474          | 0.452          |
| 0.572         | 0.083           | 0.144           | AA056013 | EST                                                                                   | 0.583        | 0.285          | 0.489          |
| 0.548         | 0.080           | 0.145           | AA057233 | S-antigen; retina and pineal gland (arrestin)                                         | 0.581        | 0.308          | 0.530          |
| 1.129         | 0.166           | 0.147           | N48652   | tumor protein p53-binding protein, 2                                                  | 1.063        | 0.601          | 0.565          |
| 0.340         | 0.050           | 0.148           | AA400474 | ESTs, Highly similar to zona-pellucida-binding protein [H.sapiens]                    | 0.466        | 0.200          | 0.428          |
| 1.005         | 0.151           | 0.150           | R22179   | PAX transcription activation domain interacting protein 1 like                        | 1.053        | 0.591          | 0.561          |
| 1.723         | 0.265           | 0.154           | W46972   | solute carrier family 20 (phosphate transporter), member 1                            | 1.934        | 0.915          | 0.473          |
| 1.245         | 0.192           | 0.155           | AA063580 | TATA box binding protein (TBP)-associated factor, RNA polymerase II, F, 55kD          | 1.227        | 0.661          | 0.539          |
| 0.490         | 0.076           | 0.155           | AA453404 | PPAR binding protein                                                                  | 0.457        | 0.250          | 0.547          |

Table S1, Roth et al. 2002

|       |       |       |          |                                                                                                                                                          |       |       |       |
|-------|-------|-------|----------|----------------------------------------------------------------------------------------------------------------------------------------------------------|-------|-------|-------|
| 1.090 | 0.172 | 0.158 | AA410207 | kinesin 2 (60-70kD)                                                                                                                                      | 0.990 | 0.546 | 0.551 |
| 0.651 | 0.104 | 0.160 | R52639   | serine hydroxymethyltransferase 1 (soluble)                                                                                                              | 0.676 | 0.358 | 0.529 |
| 1.350 | 0.219 | 0.162 | AA481562 | aspartyl-tRNA synthetase                                                                                                                                 | 1.330 | 0.656 | 0.494 |
| 0.547 | 0.089 | 0.163 | R62603   | collagen, type VI, alpha 3                                                                                                                               | 0.529 | 0.281 | 0.533 |
| 0.438 | 0.074 | 0.168 | T70057   | immunoglobulin J polypeptide, linker protein for immunoglobulin alpha and mu polypeptides                                                                | 0.400 | 0.200 | 0.502 |
| 0.469 | 0.079 | 0.169 | R51021   | cytochrome P450, subfamily XXVIA, polypeptide 1                                                                                                          | 0.513 | 0.249 | 0.486 |
| 0.567 | 0.096 | 0.170 | AA644092 | non-metastatic cells 1, protein (NM23A) expressed in                                                                                                     | 0.676 | 0.288 | 0.426 |
| 0.678 | 0.118 | 0.173 | AA448664 | polymerase (DNA directed), epsilon 2                                                                                                                     | 0.611 | 0.298 | 0.488 |
| 1.067 | 0.185 | 0.174 | AA400234 | nuclear receptor co-repressor 2                                                                                                                          | 1.137 | 0.592 | 0.521 |
| 1.253 | 0.220 | 0.175 | H58873   | solute carrier family 2 (facilitated glucose transporter), member 1                                                                                      | 1.183 | 0.610 | 0.516 |
| 0.580 | 0.107 | 0.184 | AA447748 | dihydrolipoamide dehydrogenase (E3 component of pyruvate dehydrogenase complex, 2-oxo-glutarate complex, branched chain keto acid dehydrogenase complex) | 0.520 | 0.302 | 0.580 |
| 0.506 | 0.094 | 0.186 | AA421269 | EST, Highly similar to phosphatidylinositol 4-kinase 230 [H.sapiens]                                                                                     | 0.522 | 0.254 | 0.487 |
| 0.383 | 0.073 | 0.190 | AA127093 | histone deacetylase 2                                                                                                                                    | 0.341 | 0.157 | 0.460 |
| 2.247 | 0.440 | 0.196 | AA449361 | ring finger protein 13                                                                                                                                   | 2.039 | 1.096 | 0.538 |
| 1.056 | 0.208 | 0.197 | AA490996 | interferon, gamma-inducible protein 16                                                                                                                   | 1.198 | 0.673 | 0.562 |
| 1.054 | 0.208 | 0.197 | AA610004 | Homo sapiens putative oncogene protein mRNA, partial cds                                                                                                 | 1.015 | 0.574 | 0.566 |
| 0.635 | 0.126 | 0.199 | AA699317 | ring-box 1                                                                                                                                               | 0.709 | 0.336 | 0.474 |
| 0.476 | 0.095 | 0.200 | AA504113 | M-phase phosphoprotein 10 (U3 small nucleolar ribonucleoprotein)                                                                                         | 0.459 | 0.269 | 0.585 |
| 0.315 | 0.063 | 0.201 | AA432261 | testis-specific ankyrin motif containing protein                                                                                                         | 0.357 | 0.173 | 0.483 |
| 1.011 | 0.207 | 0.204 | W31899   | zinc finger protein 165                                                                                                                                  | 0.968 | 0.493 | 0.509 |
| 1.021 | 0.211 | 0.206 | N29901   | dihydrolipoamide S-acetyltransferase (E2 component of pyruvate dehydrogenase complex)                                                                    | 1.105 | 0.626 | 0.566 |
| 1.071 | 0.225 | 0.211 | R63702   | cyclin T2                                                                                                                                                | 0.927 | 0.430 | 0.464 |

Table S1, Roth et al. 2002

|       |       |       |          |                                                                                                                                      |       |       |       |
|-------|-------|-------|----------|--------------------------------------------------------------------------------------------------------------------------------------|-------|-------|-------|
| 0.600 | 0.126 | 0.211 | H23075   | hydroxyacyl-Coenzyme A dehydrogenase/3-ketoacyl-Coenzyme A thiolase/enoyl-Coenzyme A hydratase (trifunctional protein), beta subunit | 0.593 | 0.327 | 0.551 |
| 0.291 | 0.061 | 0.211 | AA463411 | chondroitin sulfate proteoglycan 6 (bamacan)                                                                                         | 0.298 | 0.164 | 0.552 |
| 0.616 | 0.130 | 0.211 | H87471   | kynureninase (L-kynurenine hydrolase)                                                                                                | 0.745 | 0.379 | 0.508 |
| 0.317 | 0.067 | 0.212 | AA429895 | ATP-binding cassette, sub-family C (CFTR/MRP), member 3                                                                              | 0.330 | 0.161 | 0.486 |
| 0.254 | 0.054 | 0.213 | AA701929 | bystin-like                                                                                                                          | 0.274 | 0.161 | 0.588 |
| 0.373 | 0.080 | 0.214 | H15677   | protein phosphatase 2 (formerly 2A), regulatory subunit B (PR 52), beta isoform                                                      | 0.384 | 0.211 | 0.549 |
| 0.460 | 0.099 | 0.216 | H05935   | cytochrome P450, subfamily XXVIIA (steroid 27-hydroxylase, cerebrotendinous xanthomatosis), polypeptide 1                            | 0.659 | 0.281 | 0.427 |
| 0.719 | 0.156 | 0.217 | H68922   | integrin, alpha 1                                                                                                                    | 0.738 | 0.382 | 0.518 |
| 0.330 | 0.072 | 0.219 | AA490159 | glucose-6-phosphatase, transport (glucose-6-phosphate) protein 1                                                                     | 0.294 | 0.137 | 0.466 |
| 0.783 | 0.171 | 0.219 | AA405989 | death-associated protein 6                                                                                                           | 0.825 | 0.473 | 0.573 |
| 0.495 | 0.108 | 0.219 | N31933   | tyrosinase (oculocutaneous albinism IA)                                                                                              | 0.473 | 0.252 | 0.533 |
| 1.197 | 0.263 | 0.220 | W45688   | caspase 6, apoptosis-related cysteine protease                                                                                       | 1.361 | 0.690 | 0.507 |
| 0.396 | 0.087 | 0.220 | R54807   | sarcoglycan, beta (43kD dystrophin-associated glycoprotein)                                                                          | 0.467 | 0.265 | 0.568 |
| 0.345 | 0.076 | 0.221 | AA122287 | glycoprotein A repetitions predominant                                                                                               | 0.334 | 0.186 | 0.556 |
| 1.305 | 0.296 | 0.227 | R72097   | pepsinogen 5, group I (pepsinogen A)                                                                                                 | 1.306 | 0.685 | 0.524 |
| 0.430 | 0.099 | 0.231 | AA447986 | heat shock 40kD protein 2                                                                                                            | 0.438 | 0.209 | 0.477 |
| 3.138 | 0.725 | 0.231 | W86860   | nuclear VCP-like                                                                                                                     | 2.633 | 1.521 | 0.578 |
| 1.185 | 0.277 | 0.234 | N36882   | v-yes-1 Yamaguchi sarcoma viral oncogene homolog 1                                                                                   | 1.312 | 0.727 | 0.554 |
| 0.310 | 0.073 | 0.236 | N52533   | EST                                                                                                                                  | 0.279 | 0.155 | 0.557 |
| 0.801 | 0.190 | 0.237 | AA055163 | calsequestrin 2, cardiac muscle zinc finger protein 184 (Kruppel-like)                                                               | 0.983 | 0.478 | 0.487 |
| 0.522 | 0.124 | 0.238 | AA455657 | zinc finger protein 184 (Kruppel-like)                                                                                               | 0.515 | 0.242 | 0.469 |
| 2.622 | 0.628 | 0.239 | R48320   | EphB1                                                                                                                                | 3.200 | 1.554 | 0.486 |
| 0.382 | 0.092 | 0.242 | R40059   | nucleoporin 153kD                                                                                                                    | 0.364 | 0.199 | 0.546 |
| 1.457 | 0.353 | 0.242 | R54818   | eukaryotic translation initiation factor 2B, subunit 5 (epsilon, 82kD)                                                               | 1.688 | 0.966 | 0.573 |

Table S1, Roth et al. 2002

|       |       |       |          |                                                                                                             |       |       |       |
|-------|-------|-------|----------|-------------------------------------------------------------------------------------------------------------|-------|-------|-------|
| 0.450 | 0.110 | 0.243 | AA195959 | cysteine and glycine-rich protein 3 (cardiac LIM protein)                                                   | 0.396 | 0.184 | 0.464 |
| 1.002 | 0.244 | 0.244 | AA150918 | hydroxysteroid (11-beta) dehydrogenase 1                                                                    | 1.038 | 0.604 | 0.581 |
| 0.421 | 0.104 | 0.246 | AA460265 | ets variant gene 5 (ets-related molecule)                                                                   | 0.468 | 0.275 | 0.587 |
| 0.390 | 0.097 | 0.248 | AA136710 | glyoxalase I                                                                                                | 0.367 | 0.209 | 0.571 |
| 0.421 | 0.104 | 0.248 | AA504844 | DKFZp434J1813 protein                                                                                       | 0.409 | 0.234 | 0.573 |
| 2.344 | 0.582 | 0.248 | N25204   | leukemia associated gene 2                                                                                  | 2.353 | 1.091 | 0.464 |
| 0.972 | 0.245 | 0.252 | AA451792 | protein phosphatase 3 (formerly 2B), catalytic subunit, alpha isoform (calcineurin A alpha)                 | 1.149 | 0.611 | 0.531 |
| 0.775 | 0.196 | 0.252 | R38433   | phosphofructokinase, platelet                                                                               | 0.847 | 0.473 | 0.559 |
| 0.198 | 0.050 | 0.253 | AA465386 | ESTs                                                                                                        | 0.165 | 0.089 | 0.543 |
| 1.080 | 0.277 | 0.256 | H49511   | neurogranin (protein kinase C substrate, RC3)                                                               | 1.119 | 0.650 | 0.581 |
| 0.276 | 0.071 | 0.257 | T64878   | peanut (Drosophila)-like 2                                                                                  | 0.359 | 0.146 | 0.406 |
| 0.589 | 0.152 | 0.258 | H08808   | ESTs                                                                                                        | 0.602 | 0.350 | 0.582 |
| 0.513 | 0.135 | 0.263 | R76437   | thromboxane A synthase 1 (platelet, cytochrome P450, subfamily V)                                           | 0.494 | 0.281 | 0.568 |
| 0.857 | 0.226 | 0.264 | AA453477 | X-prolyl aminopeptidase (aminopeptidase P)-like                                                             | 1.092 | 0.635 | 0.582 |
| 0.349 | 0.093 | 0.267 | N50636   | Homo sapiens guanine nucleotide exchange factor smgGDS (RAP1GDS1) mRNA, alternatively spliced, complete cds | 0.363 | 0.155 | 0.426 |
| 1.947 | 0.526 | 0.270 | H15431   | polymerase (RNA) II (DNA directed) polypeptide D                                                            | 2.160 | 1.094 | 0.507 |
| 2.419 | 0.660 | 0.273 | H78385   | huntingtin-interacting protein 2                                                                            | 2.235 | 0.987 | 0.442 |
| 0.516 | 0.142 | 0.274 | AA679208 | transforming growth factor beta-activated kinase-binding protein 1                                          | 0.501 | 0.246 | 0.492 |
| 1.362 | 0.376 | 0.276 | AA431439 | guanylate cyclase activator 1A (retina)                                                                     | 1.311 | 0.575 | 0.439 |
| 0.944 | 0.261 | 0.276 | AA136533 | transcription elongation factor B (SIII), polypeptide 1-like                                                | 0.947 | 0.517 | 0.546 |
| 1.014 | 0.281 | 0.277 | W45148   | acid phosphatase 1, soluble                                                                                 | 1.026 | 0.582 | 0.567 |
| 2.348 | 0.654 | 0.279 | AA496800 | Human transposon-like element mRNA                                                                          | 2.217 | 1.294 | 0.583 |
| 0.274 | 0.076 | 0.279 | AA401428 | nucleoporin 214kD (CAIN)                                                                                    | 0.344 | 0.202 | 0.588 |
| 0.627 | 0.176 | 0.280 | AA460688 | neuropeptide FF-amide peptide precursor                                                                     | 0.712 | 0.367 | 0.516 |
| 0.628 | 0.178 | 0.283 | AA481555 | thyroid hormone receptor coactivating protein                                                               | 0.627 | 0.259 | 0.414 |
| 2.041 | 0.579 | 0.284 | AA046430 | lung type-I cell membrane-associated glycoprotein                                                           | 2.720 | 1.426 | 0.524 |
| 0.438 | 0.125 | 0.286 | AA490046 | fibroblast growth factor (acidic) intracellular binding protein                                             | 0.516 | 0.303 | 0.587 |

Table S1, Roth et al. 2002

|       |       |       |          |                                                                                                                                      |       |       |       |
|-------|-------|-------|----------|--------------------------------------------------------------------------------------------------------------------------------------|-------|-------|-------|
| 0.601 | 0.173 | 0.288 | AA181300 | proteasome (prosome, macropain) subunit, beta type, 8 (large multifunctional protease 7)                                             | 0.707 | 0.356 | 0.504 |
| 0.492 | 0.142 | 0.289 | AA449459 | sulfotransferase, estrogen-preferring                                                                                                | 0.621 | 0.320 | 0.515 |
| 0.923 | 0.267 | 0.290 | AA430035 | reticulon 3                                                                                                                          | 0.637 | 0.351 | 0.551 |
| 1.290 | 0.374 | 0.290 | N50745   | cortistatin                                                                                                                          | 1.817 | 0.970 | 0.534 |
| 2.550 | 0.741 | 0.291 | N94713   | intersectin 2                                                                                                                        | 2.759 | 1.416 | 0.513 |
| 0.349 | 0.102 | 0.292 | AA001749 | microtubule-associated protein, RP/EB family, member 1                                                                               | 0.374 | 0.208 | 0.556 |
| 0.749 | 0.223 | 0.297 | AA680129 | polymerase (DNA directed), epsilon                                                                                                   | 0.759 | 0.434 | 0.572 |
| 1.301 | 0.393 | 0.302 | H05899   | heterogeneous nuclear ribonucleoprotein C (C1/C2)                                                                                    | 1.286 | 0.701 | 0.545 |
| 0.264 | 0.080 | 0.303 | H13688   | SMC (mouse) homolog, X chromosome                                                                                                    | 0.364 | 0.201 | 0.553 |
| 0.308 | 0.094 | 0.305 | H23075   | hydroxyacyl-Coenzyme A dehydrogenase/3-ketoacyl-Coenzyme A thiolase/enoyl-Coenzyme A hydratase (trifunctional protein), beta subunit | 0.347 | 0.171 | 0.492 |
| 0.635 | 0.195 | 0.306 | AA419251 | interferon induced transmembrane protein 1 (9-27)                                                                                    | 0.579 | 0.297 | 0.512 |
| 0.886 | 0.275 | 0.310 | AA401883 | sialidase 1 (lysosomal sialidase)                                                                                                    | 0.723 | 0.317 | 0.439 |
| 0.357 | 0.111 | 0.311 | T73558   | deoxyribonuclease I-like 3                                                                                                           | 0.388 | 0.210 | 0.541 |
| 1.783 | 0.566 | 0.317 | AA460251 | NADH dehydrogenase (ubiquinone) 1, subcomplex unknown, 1 (6kD, KFYI)                                                                 | 1.465 | 0.794 | 0.542 |
| 0.843 | 0.270 | 0.320 | AA463204 | pleomorphic adenoma gene-like 1                                                                                                      | 0.758 | 0.412 | 0.544 |
| 0.307 | 0.101 | 0.328 | AA520979 | transmembrane 7 superfamily member 1 (upregulated in kidney)                                                                         | 0.297 | 0.150 | 0.506 |
| 0.400 | 0.131 | 0.328 | AA425687 | DEAD/H (Asp-Glu-Ala-Asp/His) box polypeptide 1                                                                                       | 0.375 | 0.205 | 0.547 |
| 0.145 | 0.048 | 0.329 | H66484   | nuclear body protein Sp140                                                                                                           | 0.135 | 0.058 | 0.431 |
| 0.767 | 0.256 | 0.334 | AA403126 | proteasome (prosome, macropain) 26S subunit, non-ATPase, 9                                                                           | 0.986 | 0.457 | 0.464 |
| 0.616 | 0.207 | 0.335 | AA429882 | similar to yeast BET3 (S. cerevisiae)                                                                                                | 0.699 | 0.309 | 0.442 |
| 0.775 | 0.263 | 0.340 | AA147594 | tumor necrosis factor receptor superfamily, member 8                                                                                 | 0.791 | 0.394 | 0.498 |
| 0.343 | 0.118 | 0.344 | H26182   | neuronal PAS domain protein 2                                                                                                        | 0.299 | 0.124 | 0.413 |
| 2.070 | 0.711 | 0.344 | AA459401 | kallikrein 10                                                                                                                        | 2.268 | 1.272 | 0.561 |
| 0.186 | 0.064 | 0.344 | AA708816 | clathrin, heavy polypeptide-like 1                                                                                                   | 0.221 | 0.129 | 0.586 |
| 1.799 | 0.620 | 0.345 | AA293192 | putative nucleic acid binding protein RY-1                                                                                           | 2.075 | 1.076 | 0.519 |

Table S1, Roth et al. 2002

|       |       |       |          |                                                                                                        |       |       |       |
|-------|-------|-------|----------|--------------------------------------------------------------------------------------------------------|-------|-------|-------|
| 0.651 | 0.225 | 0.345 | AA521025 | G protein pathway suppressor 1                                                                         | 0.564 | 0.284 | 0.504 |
| 0.246 | 0.085 | 0.345 | N63988   | ESTs                                                                                                   | 0.221 | 0.125 | 0.566 |
| 1.876 | 0.653 | 0.348 | N94385   | cartilage oligomeric matrix protein (pseudoachondroplasia, epiphyseal dysplasia 1, multiple)           | 2.123 | 1.232 | 0.580 |
| 1.751 | 0.616 | 0.352 | N99154   | protein kinase, Y-linked                                                                               | 1.347 | 0.722 | 0.536 |
| 0.861 | 0.307 | 0.357 | AA429310 | chromosome 2 open reading frame 3                                                                      | 0.927 | 0.502 | 0.541 |
| 0.262 | 0.094 | 0.359 | AA504266 | stromal antigen 2                                                                                      | 0.279 | 0.164 | 0.586 |
| 1.644 | 0.593 | 0.360 | AA088258 | Human protein immuno-reactive with anti-PTH polyclonal antibodies mRNA, partial cds                    | 1.899 | 1.115 | 0.587 |
| 1.004 | 0.365 | 0.364 | AA630734 | seryl-tRNA synthetase                                                                                  | 1.083 | 0.635 | 0.586 |
| 1.725 | 0.628 | 0.364 | N62245   | CDC7 (cell division cycle 7, S. cerevisiae, homolog)-like 1                                            | 1.689 | 0.791 | 0.468 |
| 0.835 | 0.305 | 0.365 | AA406040 | maternal G10 transcript                                                                                | 0.885 | 0.465 | 0.526 |
| 0.412 | 0.150 | 0.365 | AA427954 | hook2 protein                                                                                          | 0.478 | 0.242 | 0.507 |
| 0.474 | 0.175 | 0.369 | AA133212 | nuclear receptor coactivator 4                                                                         | 0.354 | 0.187 | 0.528 |
| 1.072 | 0.397 | 0.370 | AA459909 | 6-pyruvoyl-tetrahydropterin synthase/dimerization cofactor of hepatocyte nuclear factor 1 alpha (TCF1) | 1.160 | 0.666 | 0.574 |
| 3.442 | 1.277 | 0.371 | AA150301 | adrenal gland protein AD-004                                                                           | 3.038 | 1.700 | 0.560 |
| 0.250 | 0.093 | 0.373 | H28952   | ADP-ribosylation factor 4-like                                                                         | 0.288 | 0.163 | 0.567 |
| 0.870 | 0.325 | 0.373 | AA454113 | meprin A, alpha (PABA peptide hydrolase)                                                               | 0.843 | 0.465 | 0.551 |
| 0.512 | 0.194 | 0.378 | AA424344 | uroporphyrinogen decarboxylase                                                                         | 0.579 | 0.249 | 0.430 |
| 1.051 | 0.399 | 0.379 | AA469965 | lymphocyte-specific protein tyrosine kinase                                                            | 1.122 | 0.576 | 0.514 |
| 3.200 | 1.234 | 0.386 | AA418564 | ESTs, Moderately similar to I59372 cadherin 12 - human [H.sapiens]                                     | 3.369 | 1.639 | 0.487 |
| 0.538 | 0.210 | 0.390 | AA427891 | activated p21cdc42Hs kinase                                                                            | 0.563 | 0.321 | 0.570 |
| 0.299 | 0.118 | 0.394 | AA436871 | syntaxin 3A                                                                                            | 0.293 | 0.171 | 0.584 |
| 2.691 | 1.060 | 0.394 | AA136566 | forkhead box M1                                                                                        | 2.503 | 1.236 | 0.494 |
| 0.187 | 0.074 | 0.397 | AA291484 | cytochrome P450, subfamily IVB, polypeptide 1                                                          | 0.207 | 0.107 | 0.515 |
| 0.237 | 0.096 | 0.406 | AA448157 | cytochrome P450, subfamily I (dioxin-inducible), polypeptide 1 (glaucoma 3, primary infantile)         | 0.260 | 0.147 | 0.566 |
| 3.422 | 1.390 | 0.406 | AA450062 | prostate differentiation factor                                                                        | 4.078 | 1.980 | 0.485 |
| 0.924 | 0.376 | 0.406 | H08808   | ESTs                                                                                                   | 0.972 | 0.521 | 0.535 |
| 0.242 | 0.099 | 0.409 | N92901   | fatty acid binding protein 4, adipocyte                                                                | 0.527 | 0.216 | 0.409 |
| 0.301 | 0.123 | 0.411 | AA625662 | histone acetyltransferase 1                                                                            | 0.336 | 0.193 | 0.576 |
| 0.267 | 0.113 | 0.422 | AA490044 | solute carrier family 5 (inositol transporters), member 3                                              | 0.323 | 0.177 | 0.549 |
| 1.287 | 0.546 | 0.424 | AA428196 | POU domain, class 4, transcription factor 1                                                            | 1.457 | 0.710 | 0.488 |

Table S1, Roth et al. 2002

|       |       |       |          |                                                                                                               |       |       |       |
|-------|-------|-------|----------|---------------------------------------------------------------------------------------------------------------|-------|-------|-------|
| 0.657 | 0.279 | 0.425 | AA701545 | ribonuclease, RNase A family, k6                                                                              | 0.729 | 0.300 | 0.411 |
| 0.296 | 0.126 | 0.426 | AA626867 | KDEL (Lys-Asp-Glu-Leu) endoplasmic reticulum protein retention receptor 2                                     | 0.280 | 0.140 | 0.499 |
| 2.970 | 1.283 | 0.432 | AA262504 | eyes absent (Drosophila) homolog 3                                                                            | 2.998 | 1.739 | 0.580 |
| 0.915 | 0.402 | 0.439 | AA446839 | BCL2/adenovirus E1B 19kD-interacting protein 3                                                                | 0.770 | 0.438 | 0.568 |
| 0.681 | 0.299 | 0.439 | AA430178 | RAN binding protein 2-like 1                                                                                  | 0.630 | 0.313 | 0.497 |
| 0.415 | 0.183 | 0.440 | AA446928 | v-erb-b2 avian erythroblastic leukemia viral oncogene homolog 2 (neuro/glioblastoma derived oncogene homolog) | 0.495 | 0.276 | 0.557 |
| 0.576 | 0.258 | 0.447 | AA148536 | nucleoporin 98kD                                                                                              | 0.604 | 0.283 | 0.468 |
| 0.766 | 0.347 | 0.453 | AA460728 | voltage-dependent anion channel 3                                                                             | 0.660 | 0.384 | 0.581 |
| 1.532 | 0.703 | 0.459 | AA447632 | glycoprotein M6A                                                                                              | 1.994 | 1.170 | 0.587 |
| 0.592 | 0.273 | 0.462 | AA670380 | diphtheria toxin resistance protein required for diphthamide biosynthesis (Saccharomyces)-like 1              | 0.505 | 0.263 | 0.521 |
| 0.572 | 0.266 | 0.464 | W88884   | TAR DNA binding protein                                                                                       | 0.558 | 0.319 | 0.572 |
| 0.108 | 0.051 | 0.470 | AA682386 | oxidised low density lipoprotein (lectin-like) receptor 1                                                     | 0.154 | 0.072 | 0.468 |
| 0.362 | 0.171 | 0.474 | AA630017 | transcription elongation factor B (SIII), polypeptide 2 (18kD, elongin B)                                     | 0.369 | 0.212 | 0.574 |
| 0.154 | 0.073 | 0.478 | AA676802 | sialic acid binding Ig-like lectin 5                                                                          | 0.137 | 0.079 | 0.577 |
| 0.343 | 0.166 | 0.485 | AA476490 | thyroid hormone receptor interactor 4                                                                         | 0.327 | 0.180 | 0.551 |
| 0.670 | 0.326 | 0.486 | AA490538 | zinc finger protein homologous to Zfp161 in mouse                                                             | 0.616 | 0.341 | 0.554 |
| 0.461 | 0.227 | 0.493 | AA476438 | similar to rat HREV107                                                                                        | 0.532 | 0.289 | 0.544 |
| 0.162 | 0.080 | 0.494 | AA046067 | ESTs                                                                                                          | 0.147 | 0.086 | 0.581 |
| 1.617 | 0.805 | 0.498 | AA461506 | testis-specific kinase 1                                                                                      | 1.908 | 0.864 | 0.453 |
| 0.141 | 0.071 | 0.500 | AA702663 | myosin IXB                                                                                                    | 0.147 | 0.083 | 0.562 |
| 0.321 | 0.656 | 2.042 | AA156793 | similar to glucosamine-6-sulfatases                                                                           | 0.194 | 0.417 | 2.149 |
| 0.167 | 0.341 | 2.046 | N64862   | FYN-binding protein (FYB-120/130)                                                                             | 0.117 | 0.277 | 2.374 |
| 0.183 | 0.378 | 2.060 | H12320   | cAMP responsive element binding protein 1                                                                     | 0.136 | 0.260 | 1.913 |
| 0.575 | 1.190 | 2.070 | AA191488 | solute carrier family 31 (copper transporters), member 1                                                      | 0.374 | 0.820 | 2.194 |
| 0.229 | 0.476 | 2.075 | AA036881 | chemokine (C-C motif) receptor 1                                                                              | 0.113 | 0.339 | 3.000 |
| 0.391 | 0.818 | 2.090 | R45413   | sarcoma amplified sequence                                                                                    | 0.206 | 0.526 | 2.557 |
| 0.601 | 1.260 | 2.095 | AA428778 | ephrin-B1                                                                                                     | 0.399 | 0.937 | 2.344 |
| 0.577 | 1.216 | 2.107 | H65066   | visinin-like 1                                                                                                | 0.411 | 0.810 | 1.972 |

Table S1, Roth et al. 2002

|       |        |        |          |                                                                                                   |       |       |       |
|-------|--------|--------|----------|---------------------------------------------------------------------------------------------------|-------|-------|-------|
| 0.454 | 0.964  | 2.125  | H99588   | lymphoid nuclear protein related to AF4                                                           | 0.286 | 0.716 | 2.502 |
| 0.244 | 0.518  | 2.128  | R60019   | membrane protein, palmitoylated 2 (MAGUK p55 subfamily member 2)                                  | 0.169 | 0.353 | 2.091 |
| 7.779 | 16.951 | 2.179  | AA455272 | ITBA1 gene                                                                                        | 5.361 | 9.517 | 1.775 |
| 0.308 | 0.684  | 2.220  | AA679177 | butyrate-induced transcript 1                                                                     | 0.246 | 0.438 | 1.778 |
| 0.169 | 0.376  | 2.226  | R72079   | CD79B antigen (immunoglobulin-associated beta)                                                    | 0.125 | 0.311 | 2.485 |
| 0.374 | 0.840  | 2.247  | AA448400 | plectin 1, intermediate filament binding protein, 500kD                                           | 0.298 | 0.561 | 1.887 |
| 0.185 | 0.419  | 2.261  | AA011347 | IGF-II mRNA-binding protein 3                                                                     | 0.151 | 0.286 | 1.893 |
| 0.326 | 0.749  | 2.294  | H46425   | purine-rich element binding protein A                                                             | 0.254 | 0.470 | 1.850 |
| 0.200 | 0.470  | 2.346  | R52085   | growth differentiation factor 10                                                                  | 0.240 | 0.581 | 2.422 |
| 0.161 | 0.378  | 2.349  | R51209   | protein phosphatase 2A, regulatory subunit B' (PR 53)                                             | 0.249 | 0.478 | 1.919 |
| 0.341 | 0.806  | 2.363  | AA868929 | troponin T1, skeletal, slow                                                                       | 0.237 | 0.417 | 1.758 |
| 0.106 | 0.261  | 2.472  | AA036975 | amine oxidase, copper containing 3 (vascular adhesion protein 1)                                  | 0.076 | 0.206 | 2.712 |
| 0.285 | 0.706  | 2.477  | AA683321 | EST                                                                                               | 0.205 | 0.697 | 3.405 |
| 0.170 | 0.427  | 2.510  | N53449   | RAD52 (S. cerevisiae) homolog                                                                     | 0.124 | 0.286 | 2.312 |
| 0.081 | 0.207  | 2.562  | W61116   | mitogen-activated protein kinase kinase kinase 14                                                 | 0.070 | 0.207 | 2.948 |
| 0.166 | 0.430  | 2.597  | AA683073 | synaptotagmin 1                                                                                   | 0.117 | 0.276 | 2.351 |
| 0.184 | 0.480  | 2.611  | T39411   | phosphatidylinositol-4-phosphate 5-kinase, type II, alpha                                         | 0.166 | 0.417 | 2.509 |
| 0.154 | 0.403  | 2.628  | H05919   | eukaryotic translation initiation factor 4A, isoform 2                                            | 0.160 | 0.391 | 2.444 |
| 0.093 | 0.252  | 2.712  | N62761   | fragile X mental retardation, autosomal homolog 1                                                 | 0.055 | 0.114 | 2.059 |
| 0.624 | 1.898  | 3.041  | T94169   | mitogen-activated protein kinase 8                                                                | 0.299 | 1.173 | 3.922 |
| 1.032 | 3.326  | 3.222  | AA478436 | SWI/SNF related, matrix associated, actin dependent regulator of chromatin, subfamily d, member 2 | 0.792 | 2.177 | 2.749 |
| 0.512 | 1.654  | 3.230  | AA455925 | four and a half LIM domains 1                                                                     | 0.216 | 0.367 | 1.700 |
| 0.092 | 0.315  | 3.422  | AA026557 | spleen focus forming virus (SFFV) proviral integration oncogene spi1                              | 0.077 | 0.271 | 3.537 |
| 0.173 | 0.677  | 3.904  | T61948   | FBJ murine osteosarcoma viral oncogene homolog B                                                  | 0.135 | 0.276 | 2.050 |
| 2.940 | 14.259 | 4.850  | AA076063 | caldesmon 1                                                                                       | 2.392 | 5.195 | 2.172 |
| 0.182 | 3.247  | 17.824 | R68106   | Fc fragment of IgG, low affinity IIb, receptor for (CD32)                                         | 0.111 | 0.240 | 2.173 |
| 0.103 | 2.502  | 24.253 | AA443634 | ubiquitin-conjugating enzyme E2G 2 (homologous to yeast UBC7)                                     | 0.084 | 0.209 | 2.490 |
