# Supplementary material
Source: PubMed Central journal article supplement (PMC2812433)
Supplement: NIHMS169756-supplement-Suppl_Table_2.pdf [file NIHMS169756-supplement-Suppl_Table_2.pdf]

Table S2, Roth et al. 2002

| Older men Before-ST | Older Women Before-ST | Older Ratio | Acc#     | Gene                                                                                    | Young Men Before-ST | Young Women Before-ST | Young Ratio |
|---------------------|-----------------------|-------------|----------|-----------------------------------------------------------------------------------------|---------------------|-----------------------|-------------|
| 2.456               | 0.450                 | 0.183       | AA598526 | hypoxia-inducible factor 1, alpha subunit (basic helix-loop-helix transcription factor) | 2.500               | 0.453                 | 0.181       |
| 3.069               | 0.615                 | 0.200       | W86860   | nuclear VCP-like                                                                        | 3.206               | 0.835                 | 0.261       |
| 2.985               | 0.634                 | 0.212       | R48320   | EphB1                                                                                   | 2.260               | 0.622                 | 0.275       |
| 3.466               | 0.748                 | 0.216       | R60995   | coagulation factor C (Limulus polyphemus) homology (cochlin)                            | 3.848               | 1.072                 | 0.279       |
| 2.824               | 0.619                 | 0.219       | AA456101 | phosphoinositide-3-kinase, class 3                                                      | 3.378               | 0.555                 | 0.164       |
| 2.091               | 0.462                 | 0.221       | AA449361 | ring finger protein 13                                                                  | 2.404               | 0.418                 | 0.174       |
| 3.349               | 0.742                 | 0.222       | AA872602 | parathyroid hormone receptor 1                                                          | 5.527               | 0.650                 | 0.118       |
| 3.206               | 0.721                 | 0.225       | AA115076 | Cbp/p300-interacting transactivator, with Glu/Asp-rich carboxy-terminal domain, 2       | 2.363               | 0.574                 | 0.243       |
| 2.291               | 0.585                 | 0.255       | W73144   | lymphocyte cytosolic protein 1 (L-plastin)                                              | 1.825               | 0.458                 | 0.251       |
| 2.432               | 0.639                 | 0.263       | N25204   | leukemia associated gene 2                                                              | 2.256               | 0.526                 | 0.233       |
| 2.525               | 0.691                 | 0.274       | N98563   | retinoic acid- and interferon-inducible protein (58kD)                                  | 3.302               | 0.830                 | 0.251       |
| 2.624               | 0.732                 | 0.279       | N94713   | intersectin 2                                                                           | 2.476               | 0.750                 | 0.303       |
| 2.810               | 0.789                 | 0.281       | N34095   |                                                                                         | 2.261               | 0.692                 | 0.306       |
| 2.047               | 0.591                 | 0.289       | AA703392 | H factor (complement)-like 1                                                            | 1.863               | 0.613                 | 0.329       |
| 2.358               | 0.694                 | 0.294       | AA496800 | Human transposon-like element mRNA                                                      | 2.338               | 0.614                 | 0.263       |
| 2.437               | 0.729                 | 0.299       | AA419620 | fibroblast growth factor receptor 3 (achondroplasia, thanatophoric dwarfism)            | 1.832               | 0.711                 | 0.388       |
| 2.201               | 0.672                 | 0.305       | AA282063 | polymerase (RNA) III (DNA directed) (62kD)                                              | 1.927               | 0.698                 | 0.362       |
| 1.827               | 0.571                 | 0.313       | R76808   | low density lipoprotein-related protein 2                                               | 1.677               | 0.504                 | 0.301       |
| 1.784               | 0.559                 | 0.313       | H15431   | polymerase (RNA) II (DNA directed) polypeptide D                                        | 2.110               | 0.493                 | 0.234       |
| 1.393               | 0.443                 | 0.318       | AA449118 | transcription factor 6-like 1 (mitochondrial transcription factor 1-like)               | 1.581               | 0.401                 | 0.254       |
| 2.260               | 0.725                 | 0.321       | H78385   | huntingtin-interacting protein 2                                                        | 2.578               | 0.595                 | 0.231       |
| 2.480               | 0.801                 | 0.323       | AA459401 | kallikrein 10                                                                           | 1.660               | 0.621                 | 0.374       |
| 1.231               | 0.401                 | 0.325       | AA464711 | complement component 3a receptor 1                                                      | 1.332               | 0.418                 | 0.314       |
| 1.991               | 0.663                 | 0.333       | R08876   | 26S proteasome-associated pad1 homolog                                                  | 2.932               | 0.581                 | 0.198       |
| 2.479               | 0.833                 | 0.336       | AA458838 | phorbol-12-myristate-13-acetate-induced protein 1                                       | 2.144               | 0.661                 | 0.309       |
| 1.426               | 0.485                 | 0.340       | H17528   | aryl hydrocarbon receptor nuclear translocator-like                                     | 1.561               | 0.496                 | 0.318       |
| 1.789               | 0.627                 | 0.351       | H59861   | thrombomodulin                                                                          | 2.299               | 0.688                 | 0.299       |
| 1.776               | 0.627                 | 0.353       | R43325   | death associated protein 3                                                              | 1.703               | 0.544                 | 0.319       |
| 1.406               | 0.501                 | 0.356       | AA452933 | H2A histone family, member L                                                            | 1.186               | 0.400                 | 0.337       |
| 1.895               | 0.677                 | 0.357       | AA293192 | putative nucleic acid binding protein RY-1                                              | 1.703               | 0.563                 | 0.331       |
| 1.969               | 0.706                 | 0.358       | AA063631 |                                                                                         | 1.863               | 0.882                 | 0.473       |

Table S2, Roth et al. 2002

|       |       |       |          |                                                                                              |       |       |       |
|-------|-------|-------|----------|----------------------------------------------------------------------------------------------|-------|-------|-------|
| 7.220 | 2.612 | 0.362 | T72202   | signal transducer and activator of transcription 6, interleukin-4 induced                    | 6.990 | 3.474 | 0.497 |
| 2.005 | 0.730 | 0.364 | H98666   | procollagen (type III) N-endopeptidase                                                       | 1.998 | 0.813 | 0.407 |
| 1.708 | 0.628 | 0.368 | N62245   | CDC7 (cell division cycle 7, <i>S. cerevisiae</i> , homolog)-like 1                          | 1.741 | 0.629 | 0.361 |
| 1.735 | 0.639 | 0.368 | AA088258 | Human protein immuno-reactive with anti-PTH polyclonal antibodies mRNA                       | 1.553 | 0.546 | 0.352 |
| 1.555 | 0.579 | 0.373 | AA490459 | transcobalamin II; macrocytic anemia                                                         | 1.659 | 0.577 | 0.348 |
| 1.117 | 0.416 | 0.373 | W46493   | transcription factor Dp-1                                                                    | 1.194 | 0.473 | 0.396 |
| 2.220 | 0.837 | 0.377 | R43325   | death associated protein 3                                                                   | 1.911 | 0.671 | 0.351 |
| 2.667 | 1.036 | 0.389 | AA664241 | nascent-polypeptide-associated complex alpha polypeptide                                     | 2.443 | 0.911 | 0.373 |
| 8.229 | 3.202 | 0.389 | AA164562 | ARP3 (actin-related protein 3, yeast) homolog                                                | 7.960 | 3.695 | 0.464 |
| 1.515 | 0.598 | 0.395 | AA460251 | NADH dehydrogenase (ubiquinone) 1, subcomplex unknown, 1 (6kD, KFYI)                         | 2.052 | 0.535 | 0.261 |
| 1.543 | 0.612 | 0.397 | H68845   | peroxiredoxin 2                                                                              | 1.378 | 0.404 | 0.293 |
| 1.727 | 0.685 | 0.397 | AA046430 | lung type-I cell membrane-associated glycoprotein                                            | 2.356 | 0.473 | 0.201 |
| 1.694 | 0.672 | 0.397 | AA451684 | CD1D antigen, d polypeptide                                                                  | 2.495 | 0.505 | 0.202 |
| 2.692 | 1.070 | 0.398 | H50500   | cytochrome P450, subfamily IIE (ethanol-inducible)                                           | 3.659 | 1.206 | 0.330 |
| 5.624 | 2.238 | 0.398 | AA099394 | signal sequence receptor, alpha (translocon-associated protein alpha)                        | 4.925 | 1.654 | 0.336 |
| 2.700 | 1.076 | 0.399 | AA410435 | alpha thalassemia/mental retardation syndrome X-linked                                       | 2.898 | 1.223 | 0.422 |
| 2.165 | 0.864 | 0.399 | H02884   | cadherin 5, VE-cadherin (vascular epithelium)                                                | 2.233 | 0.604 | 0.271 |
| 1.874 | 0.761 | 0.406 | AA457114 | tumor necrosis factor, alpha-induced protein 2                                               | 1.879 | 0.779 | 0.414 |
| 3.232 | 1.326 | 0.410 | AA418564 | ESTs                                                                                         | 3.167 | 1.142 | 0.361 |
| 4.042 | 1.668 | 0.413 | H09172   | dystrobrevin, alpha                                                                          | 5.061 | 1.442 | 0.285 |
| 2.213 | 0.924 | 0.418 | N47099   | MAD (mothers against decapentaplegic, <i>Drosophila</i> ) homolog 2                          | 1.602 | 0.628 | 0.392 |
| 1.366 | 0.571 | 0.418 | AA443093 |                                                                                              | 1.352 | 0.409 | 0.303 |
| 1.875 | 0.787 | 0.420 | N94385   | cartilage oligomeric matrix protein (pseudoachondroplasia, epiphyseal dysplasia 1, multiple) | 1.877 | 0.519 | 0.277 |
| 2.343 | 0.986 | 0.421 | W46900   | GRO1 oncogene (melanoma growth stimulating activity, alpha)                                  | 2.584 | 0.963 | 0.373 |
| 7.456 | 3.138 | 0.421 | AA134814 | TRAF family member-associated NFKB activator                                                 | 4.822 | 2.429 | 0.504 |
| 2.214 | 0.941 | 0.425 | AA521026 | 8-oxoguanine DNA glycosylase                                                                 | 1.847 | 0.693 | 0.375 |
| 2.250 | 0.957 | 0.425 | AA460838 | general transcription factor IIH, polypeptide 3 (34kD subunit)                               | 1.819 | 0.592 | 0.326 |
| 3.185 | 1.361 | 0.427 | AA150301 | adrenal gland protein AD-004                                                                 | 3.699 | 1.194 | 0.323 |
| 2.902 | 1.244 | 0.429 | AA876054 | hemochromatosis                                                                              | 3.981 | 1.183 | 0.297 |
| 5.886 | 2.533 | 0.430 | R51346   | methionine aminopeptidase; eIF-2-associated p67                                              | 5.148 | 2.180 | 0.424 |
| 3.753 | 1.624 | 0.433 | R07296   | ESTs                                                                                         | 3.883 | 1.124 | 0.289 |
| 2.568 | 1.118 | 0.435 | AA034250 | ES1 (zebrafish) protein, human homolog of                                                    | 2.626 | 0.838 | 0.319 |

Table S2, Roth et al. 2002

|       |       |       |          |                                                                                                                                                           |       |       |       |
|-------|-------|-------|----------|-----------------------------------------------------------------------------------------------------------------------------------------------------------|-------|-------|-------|
| 1.356 | 0.592 | 0.437 | AA441930 | Clathrin assembly lymphoid-myeloid leukemia gene                                                                                                          | 1.170 | 0.598 | 0.511 |
| 2.657 | 1.168 | 0.440 | AA063637 | palmitoyl-protein thioesterase 1 (ceroid-palmitoyl-palmitoyl-protein thioesterase 1 (ceroid-lipofuscinosis, neuronal 1, infantile) neuronal 1, infantile) | 2.585 | 0.825 | 0.319 |
| 2.027 | 0.896 | 0.442 | R26526   | basonuclin                                                                                                                                                | 1.832 | 0.866 | 0.473 |
| 5.267 | 2.362 | 0.448 | AA488618 | transcription factor CP2                                                                                                                                  | 4.234 | 2.285 | 0.540 |
| 2.592 | 1.170 | 0.451 | AA425754 | N-ethylmaleimide-sensitive factor attachment protein, alpha                                                                                               | 2.040 | 1.027 | 0.503 |
| 1.079 | 0.487 | 0.452 | W72679   | highly expressed in cancer, rich in leucine heptad repeats                                                                                                | 1.347 | 0.423 | 0.314 |
| 4.345 | 1.969 | 0.453 | R44140   | golgi autoantigen, golgin subfamily a, 1                                                                                                                  | 3.302 | 1.862 | 0.564 |
| 1.103 | 0.500 | 0.454 | N70794   | acyl-Coenzyme A dehydrogenase, C-4 to C-12 straight chain                                                                                                 | 1.747 | 0.569 | 0.326 |
| 3.682 | 1.670 | 0.454 | W32272   | IQ motif containing GTPase activating protein 2                                                                                                           | 3.330 | 1.686 | 0.506 |
| 1.328 | 0.603 | 0.455 | AA670155 | membrane component, chromosome 11, surface marker 1                                                                                                       | 1.467 | 0.788 | 0.537 |
| 3.602 | 1.650 | 0.458 | AA446557 | nucleolar GTPase                                                                                                                                          | 2.869 | 1.286 | 0.448 |
| 1.221 | 0.562 | 0.460 | H17139   | catenin (cadherin-associated protein), delta 2 (neural plakophilin-related arm-repeat protein)                                                            | 0.918 | 0.506 | 0.551 |
| 1.197 | 0.553 | 0.462 | AA669758 | nucleophosmin (nucleolar phosphoprotein B23, numatrin)                                                                                                    | 1.154 | 0.547 | 0.474 |
| 3.508 | 1.622 | 0.462 | AA450062 | prostate differentiation factor                                                                                                                           | 3.336 | 1.158 | 0.347 |
| 3.053 | 1.432 | 0.469 | AA262504 | eyes absent (Drosophila) homolog 3                                                                                                                        | 2.888 | 1.135 | 0.393 |
| 3.356 | 1.594 | 0.475 | N64508   | podocalyxin-like                                                                                                                                          | 2.390 | 1.326 | 0.555 |
| 0.923 | 0.439 | 0.475 | AA450003 | dual-specificity tyrosine-(Y)-phosphorylation regulated kinase 4                                                                                          | 1.034 | 0.458 | 0.442 |
| 4.972 | 2.411 | 0.485 | AA132226 | heterochromatin-like protein 1                                                                                                                            | 6.374 | 2.084 | 0.327 |
| 3.058 | 1.490 | 0.487 | AA453176 | ataxia telangiectasia and Rad3 related                                                                                                                    | 2.674 | 1.513 | 0.566 |
| 4.774 | 2.331 | 0.488 | AA159620 | ecotropic viral integration site 2B                                                                                                                       | 3.681 | 2.143 | 0.582 |
| 1.273 | 0.622 | 0.489 | AA428196 | POU domain, class 4, transcription factor 1                                                                                                               | 1.302 | 0.471 | 0.362 |
| 1.248 | 0.613 | 0.491 | AA001376 | zinc finger protein 187                                                                                                                                   | 1.255 | 0.582 | 0.463 |
| 1.546 | 0.762 | 0.493 | AA456147 | general transcription factor IIIA                                                                                                                         | 1.840 | 0.684 | 0.372 |
| 3.620 | 1.792 | 0.495 | AA491213 | splicing factor, arginine/serine-rich 9                                                                                                                   | 3.969 | 1.744 | 0.439 |
| 3.799 | 1.884 | 0.496 | N50959   | amine oxidase, copper containing 2 (retina-specific)                                                                                                      | 3.934 | 2.161 | 0.549 |
| 2.346 | 1.175 | 0.501 | H17975   | armadillo repeat gene deletes in velocardiofacial syndrome                                                                                                | 2.810 | 1.093 | 0.389 |
| 2.364 | 1.186 | 0.502 | AA136566 | forkhead box M1                                                                                                                                           | 3.017 | 0.933 | 0.309 |
| 1.798 | 0.903 | 0.502 | R93176   | carbonic anhydrase I                                                                                                                                      | 2.806 | 0.771 | 0.275 |
| 1.583 | 0.795 | 0.502 | AA460393 | LIM and senescent cell antigen-like domains 1                                                                                                             | 1.410 | 0.661 | 0.469 |
| 1.235 | 0.621 | 0.503 | AA291389 | interferon-stimulated transcription factor 3, gamma (48kD)                                                                                                | 2.216 | 0.576 | 0.260 |
| 3.492 | 1.759 | 0.504 | AA478543 | A kinase (PRKA) anchor protein (gravin) 12                                                                                                                | 3.165 | 1.641 | 0.518 |

Table S2, Roth et al. 2002

|       |       |       |          |                                                                                                                            |       |       |       |
|-------|-------|-------|----------|----------------------------------------------------------------------------------------------------------------------------|-------|-------|-------|
| 1.222 | 0.616 | 0.504 | H60549   | CD59 antigen p18-20 (antigen identified by monoclonal antibodies 16.3A5, EJ16, EJ30, EL32 and G344)                        | 1.336 | 0.503 | 0.377 |
| 1.964 | 0.991 | 0.504 | R60723   | purinergic receptor P2X, ligand-gated ion channel, 4                                                                       | 1.554 | 0.913 | 0.587 |
| 1.797 | 0.918 | 0.511 | AA774638 | casein kinase 2, beta polypeptide                                                                                          | 1.844 | 0.731 | 0.397 |
| 2.345 | 1.203 | 0.513 | R55046   | MpV17 transgene, murine homolog, glomerulosclerosis                                                                        | 2.118 | 1.087 | 0.513 |
| 1.408 | 0.724 | 0.514 | AA625995 | zinc finger protein 9 (a cellular retroviral nucleic acid binding protein)                                                 | 1.851 | 0.533 | 0.288 |
| 0.910 | 0.468 | 0.514 | N32768   | pregnancy specific beta-1-glycoprotein 3                                                                                   | 0.815 | 0.437 | 0.537 |
| 2.279 | 1.177 | 0.516 | AA029934 | integrin, alpha V (vitronectin receptor, alpha polypeptide, antigen CD51)                                                  | 3.927 | 1.238 | 0.315 |
| 2.730 | 1.415 | 0.518 | AA485653 | mannosyl (alpha-1, 6-)-glycoprotein beta-1, 2-N-acetylglucosaminyltransferase                                              | 2.478 | 1.303 | 0.526 |
| 1.213 | 0.629 | 0.518 | N72193   | centrin, EF-hand protein, 2                                                                                                | 1.886 | 0.503 | 0.267 |
| 1.450 | 0.755 | 0.521 | AA458785 | guanylate cyclase 1, soluble, beta 3                                                                                       | 1.131 | 0.644 | 0.570 |
| 1.729 | 0.902 | 0.522 | R77919   | deoxyribonuclease I-like 1                                                                                                 | 1.591 | 0.699 | 0.439 |
| 0.976 | 0.509 | 0.522 | H05899   | heterogeneous nuclear ribonucleoprotein C (C1/C2)                                                                          | 1.633 | 0.584 | 0.357 |
| 1.061 | 0.554 | 0.522 | N21170   | FLN29 gene product                                                                                                         | 0.840 | 0.436 | 0.519 |
| 3.165 | 1.658 | 0.524 | AA426341 | von Hippel-Lindau binding protein 1                                                                                        | 3.783 | 1.498 | 0.396 |
| 1.286 | 0.676 | 0.526 | AA670200 | procollagen C-endopeptidase enhancer                                                                                       | 1.176 | 0.673 | 0.572 |
| 5.645 | 2.969 | 0.526 | AA489383 | ESTs                                                                                                                       | 8.267 | 2.619 | 0.317 |
| 0.787 | 0.414 | 0.526 | AA873577 | ATP synthase, H <sup>+</sup> transporting, mitochondrial F1 complex, O subunit (oligomycin sensitivity conferring protein) | 0.915 | 0.403 | 0.440 |
| 4.092 | 2.161 | 0.528 | AA878391 | glypican 5                                                                                                                 | 5.050 | 2.848 | 0.564 |
| 4.143 | 2.198 | 0.531 | AA085619 | ralA binding protein 1                                                                                                     | 4.597 | 2.391 | 0.520 |
| 0.858 | 0.455 | 0.531 | AA404264 | conserved gene amplified in osteosarcoma                                                                                   | 0.844 | 0.429 | 0.509 |
| 9.600 | 5.170 | 0.539 | AA253430 | prefoldin 4                                                                                                                | 8.503 | 4.268 | 0.502 |
| 1.383 | 0.746 | 0.540 | AA447632 | glycoprotein M6A                                                                                                           | 1.681 | 0.659 | 0.392 |
| 1.045 | 0.564 | 0.540 | AA455945 | benzodiazapine receptor (peripheral)                                                                                       | 1.305 | 0.521 | 0.400 |
| 3.200 | 1.729 | 0.540 | AA187148 | core-binding factor, beta subunit                                                                                          | 3.250 | 1.791 | 0.551 |
| 1.074 | 0.583 | 0.543 | R44982   | putative tumor suppressor                                                                                                  | 0.882 | 0.425 | 0.482 |
| 4.020 | 2.195 | 0.546 | AA085749 | ATP binding protein associated with cell differentiation                                                                   | 3.184 | 1.803 | 0.566 |
| 4.580 | 2.502 | 0.546 | AA449753 | capping protein (actin filament) muscle Z-line, alpha 1                                                                    | 5.428 | 2.275 | 0.419 |
| 2.641 | 1.443 | 0.546 | AA478480 | transcription elongation factor A (SII)-like 1                                                                             | 2.413 | 1.329 | 0.551 |
| 1.466 | 0.807 | 0.550 | AA432143 | Cbp/p300-interacting transactivator, with Glu/Asp-rich carboxy-terminal domain, 1                                          | 1.424 | 0.638 | 0.448 |
| 2.040 | 1.122 | 0.550 | R01139   | ribosomal protein L10a                                                                                                     | 3.400 | 1.275 | 0.375 |
| 0.967 | 0.532 | 0.550 | N62620   | potassium channel, subfamily K, member 1 (TWIK-1)                                                                          | 1.606 | 0.486 | 0.303 |
| 2.141 | 1.182 | 0.552 | AA844124 | ESTs                                                                                                                       | 2.200 | 1.290 | 0.586 |

Table S2, Roth et al. 2002

|       |        |       |          |                                                                                                              |       |        |       |
|-------|--------|-------|----------|--------------------------------------------------------------------------------------------------------------|-------|--------|-------|
| 2.989 | 1.671  | 0.559 | N28497   | protein phosphatase 2 (formerly 2A), regulatory subunit A (PR 65), beta isoform                              | 3.449 | 1.476  | 0.428 |
| 1.000 | 0.561  | 0.560 | H11346   | aldehyde dehydrogenase 4 (glutamate gamma-semialdehyde dehydrogenase; pyrroline-5-carboxylate dehydrogenase) | 1.078 | 0.527  | 0.489 |
| 1.660 | 0.947  | 0.570 | AA453293 | phosphodiesterase 4B, cAMP-specific (dunce (Drosophila)-homolog phosphodiesterase E4)                        | 1.818 | 0.945  | 0.520 |
| 1.958 | 1.119  | 0.572 | W80632   | Human BRCA2 region                                                                                           | 1.676 | 0.804  | 0.480 |
| 2.191 | 1.253  | 0.572 | T55560   | nitrogen fixation cluster-like                                                                               | 2.224 | 1.300  | 0.584 |
| 1.748 | 1.008  | 0.577 | AA461506 | testis-specific kinase 1                                                                                     | 1.485 | 0.603  | 0.406 |
| 0.908 | 0.526  | 0.579 | AA478043 | interferon regulatory factor 1                                                                               | 0.909 | 0.423  | 0.465 |
| 0.960 | 0.557  | 0.580 | AA482243 | cytochrome c oxidase subunit VIa polypeptide 1                                                               | 0.932 | 0.516  | 0.554 |
| 3.473 | 2.033  | 0.585 | N26062   | WD40 protein Ciao1                                                                                           | 3.145 | 1.803  | 0.573 |
| 5.265 | 3.088  | 0.586 | H23187   | carbonic anhydrase II                                                                                        | 6.612 | 3.383  | 0.512 |
| 5.876 | 10.132 | 1.724 | T81764   | cell division cycle 27                                                                                       | 7.140 | 12.273 | 1.719 |
| 4.235 | 7.400  | 1.747 | AA873499 | major histocompatibility complex, class I-like sequence                                                      | 4.000 | 10.097 | 2.524 |
| 1.807 | 3.232  | 1.789 | AA284693 | transcription factor AP-4 (activating enhancer-binding protein 4)                                            | 1.504 | 3.469  | 2.306 |
| 5.927 | 10.657 | 1.798 | AA872397 | lectin, galactoside-binding, soluble, 2 (galectin 2)                                                         | 6.730 | 11.484 | 1.707 |
| 5.386 | 9.710  | 1.803 | AA676970 | phosphoglycerate mutase 1 (brain)                                                                            | 4.461 | 9.426  | 2.113 |
| 4.050 | 7.313  | 1.806 | AA600189 | adenosine deaminase, RNA-specific                                                                            | 3.457 | 7.948  | 2.299 |
| 4.768 | 8.637  | 1.812 | W73892   | RNA binding motif protein 5                                                                                  | 4.051 | 9.429  | 2.328 |
| 5.591 | 10.197 | 1.824 | H53703   | growth factor receptor-bound protein 7                                                                       | 4.381 | 9.989  | 2.280 |
| 6.705 | 12.404 | 1.850 | AA400329 | neurofilament 3 (150kD medium)                                                                               | 4.310 | 13.564 | 3.147 |
| 4.841 | 9.118  | 1.883 | AA844818 | amylase, alpha 2A; pancreatic                                                                                | 4.789 | 11.348 | 2.370 |
| 6.814 | 12.863 | 1.888 | AA282537 | MADS box transcription enhancer factor 2, polypeptide B (myocyte enhancer factor 2B)                         | 4.998 | 11.658 | 2.333 |
| 9.387 | 17.844 | 1.901 | AA455272 | ITBA1 gene                                                                                                   | 6.171 | 16.058 | 2.602 |
| 2.138 | 4.136  | 1.935 | AA253434 | heat shock transcription factor 2                                                                            | 2.289 | 5.226  | 2.283 |
| 2.261 | 4.405  | 1.948 | AA663310 | thymidylate synthetase                                                                                       | 2.158 | 4.639  | 2.150 |
| 8.480 | 16.653 | 1.964 | AA477428 | polymerase (RNA) II (DNA directed) polypeptide G                                                             | 7.684 | 14.864 | 1.935 |
| 1.837 | 3.664  | 1.995 | AA599177 | cystatin C (amyloid angiopathy and cerebral hemorrhage)                                                      | 1.525 | 3.348  | 2.195 |
| 7.260 | 14.795 | 2.038 | AA463924 | DNA segment on chromosome X (unique) 522 expressed sequence                                                  | 6.805 | 13.529 | 1.988 |
| 5.401 | 11.341 | 2.100 | AA670347 | glucosidase, beta; acid, pseudogene                                                                          | 4.715 | 12.295 | 2.608 |
| 2.248 | 4.755  | 2.116 | AA487588 | ATPase, H <sup>+</sup> transporting, lysosomal (vacuolar proton pump), subunit 1                             | 2.369 | 4.948  | 2.088 |
| 4.197 | 8.957  | 2.134 | N70734   | troponin T2, cardiac                                                                                         | 4.174 | 10.860 | 2.602 |
| 3.830 | 8.249  | 2.154 | AA458507 | colony stimulating factor 3 receptor (granulocyte)                                                           | 3.741 | 9.474  | 2.532 |
| 4.082 | 8.851  | 2.168 | R91078   | cytochrome P450, subfamily IIIA, polypeptide 7                                                               | 3.257 | 8.826  | 2.710 |
| 3.888 | 8.700  | 2.238 | N54596   | insulin-like growth factor 2 (somatomedin A)                                                                 | 4.388 | 9.436  | 2.150 |

Table S2, Roth et al. 2002

|       |        |       |          |                                                                                                   |        |        |       |
|-------|--------|-------|----------|---------------------------------------------------------------------------------------------------|--------|--------|-------|
| 1.392 | 3.212  | 2.308 | H16958   | glyceraldehyde-3-phosphate dehydrogenase                                                          | 1.863  | 0.726  | 0.390 |
| 2.398 | 5.665  | 2.363 | AA431832 | granulin                                                                                          | 2.679  | 6.649  | 2.482 |
| 2.168 | 5.132  | 2.368 | R33154   | ESTs                                                                                              | 1.612  | 5.971  | 3.704 |
| 6.012 | 14.720 | 2.449 | R79935   |                                                                                                   | 4.907  | 14.328 | 2.920 |
| 1.503 | 3.687  | 2.453 | AA630354 | D site of albumin promoter (albumin D-box) binding protein                                        | 1.665  | 3.670  | 2.204 |
| 4.786 | 11.830 | 2.472 | AA599158 | glutamyl-prolyl-tRNA synthetase                                                                   | 4.090  | 13.170 | 3.220 |
| 2.550 | 6.343  | 2.487 | AA609880 | solute carrier family 4, anion exchanger, member 3                                                | 2.487  | 5.007  | 2.013 |
| 3.642 | 9.111  | 2.502 | AA486085 | thymosin, beta 10                                                                                 | 4.185  | 9.982  | 2.385 |
| 4.098 | 10.469 | 2.555 | AA405800 | dodecenoyl-Coenzyme A delta isomerase (3, 2 trans-enoyl-Coenzyme A isomerase)                     | 5.206  | 12.249 | 2.353 |
| 1.023 | 2.615  | 2.556 | AA666180 | nuclear receptor subfamily 2, group F, member 6                                                   | 0.860  | 1.802  | 2.095 |
| 1.406 | 3.674  | 2.614 | H16958   | glyceraldehyde-3-phosphate dehydrogenase                                                          | 1.797  | 0.770  | 0.428 |
| 7.621 | 20.229 | 2.654 | AA872001 | annexin A6                                                                                        | 10.336 | 22.418 | 2.169 |
| 7.946 | 21.287 | 2.679 | N92646   | colony stimulating factor 2 receptor, alpha, low-affinity (granulocyte-macrophage)                | 9.413  | 20.591 | 2.187 |
| 8.454 | 25.460 | 3.012 | AA291490 | glucosidase I                                                                                     | 7.136  | 20.824 | 2.918 |
| 3.437 | 10.693 | 3.111 | AA443638 | synuclein, gamma (breast cancer-specific protein 1)                                               | 3.078  | 8.948  | 2.907 |
| 0.654 | 2.113  | 3.230 | AA486072 | small inducible cytokine A5 (RANTES)                                                              | 0.846  | 1.439  | 1.701 |
| 0.486 | 1.891  | 3.895 | T94169   | mitogen-activated protein kinase 8                                                                | 0.763  | 1.906  | 2.498 |
| 3.293 | 13.784 | 4.186 | AA076063 | caldesmon 1                                                                                       | 2.587  | 14.735 | 5.695 |
| 0.501 | 2.163  | 4.321 | AA455925 | four and a half LIM domains 1                                                                     | 0.522  | 1.143  | 2.190 |
| 0.716 | 3.589  | 5.009 | AA478436 | SWI/SNF related, matrix associated, actin dependent regulator of chromatin, subfamily d, member 2 | 1.348  | 3.063  | 2.272 |
