# Supplementary material
Source: PubMed Central journal article supplement (PMC2812433)
Supplement: NIHMS169756-supplement-Suppl_Table_3.pdf [file NIHMS169756-supplement-Suppl_Table_3.pdf]

Table S3, Roth et al. 2002

| Young Before-ST | Older Before-ST | Before-ST Ratio | Acc#     | Gene                                                                                                                                                     | Young After-ST | Older After-ST | After-ST Ratio |
|-----------------|-----------------|-----------------|----------|----------------------------------------------------------------------------------------------------------------------------------------------------------|----------------|----------------|----------------|
| 0.128           | 0.049           | 0.380           | W72697   | cisplatin resistance associated                                                                                                                          | 0.111          | 0.057          | 0.514          |
| 0.351           | 0.139           | 0.395           | N90273   | ras homolog gene family, member H                                                                                                                        | 0.251          | 0.123          | 0.491          |
| 0.251           | 0.100           | 0.398           | AA443634 | ubiquitin-conjugating enzyme E2G 2 (homologous to yeast UBC7)                                                                                            | 0.223          | 0.070          | 0.314          |
| 0.089           | 0.041           | 0.455           | H38839   | EST                                                                                                                                                      | 0.110          | 0.042          | 0.379          |
| 0.269           | 0.125           | 0.464           | AA464748 | collagen, type VI, alpha 2                                                                                                                               | 0.506          | 0.154          | 0.305          |
| 0.070           | 0.033           | 0.471           | H50344   | tight junction protein 1 (zona occludens 1)                                                                                                              | 0.100          | 0.033          | 0.326          |
| 0.342           | 0.161           | 0.471           | N55480   | HMT1 (hnRNP methyltransferase, S. cerevisiae)-like 2                                                                                                     | 0.310          | 0.141          | 0.454          |
| 0.514           | 0.242           | 0.471           | R60317   | dihydrolipoamide dehydrogenase (E3 component of pyruvate dehydrogenase complex, 2-oxo-glutarate complex, branched chain keto acid dehydrogenase complex) | 0.432          | 0.192          | 0.444          |
| 0.095           | 0.045           | 0.475           | AA670422 | ADP-ribosylation factor 3                                                                                                                                | 0.089          | 0.050          | 0.559          |
| 0.231           | 0.115           | 0.496           | N62761   | fragile X mental retardation, autosomal homolog 1                                                                                                        | 0.118          | 0.051          | 0.433          |
| 0.127           | 0.063           | 0.499           | AA234671 | ATP-binding cassette, sub-family D (ALD), member 3                                                                                                       | 0.119          | 0.060          | 0.501          |
| 0.085           | 0.043           | 0.500           | H49592   | guanine nucleotide binding protein (G protein), alpha activating activity polypeptide, olfactory type                                                    | 0.126          | 0.041          | 0.322          |
| 0.083           | 0.043           | 0.513           | AA173454 | macrophage stimulating 1 receptor (c-met-related tyrosine kinase)                                                                                        | 0.111          | 0.038          | 0.345          |
| 0.065           | 0.034           | 0.518           | AA447730 | pim-1 oncogene                                                                                                                                           | 0.067          | 0.037          | 0.556          |
| 0.078           | 0.041           | 0.527           | N54794   | plasminogen activator inhibitor, type I                                                                                                                  | 0.082          | 0.043          | 0.523          |
| 0.167           | 0.089           | 0.532           | N94921   | receptor tyrosine kinase-like orphan receptor 2                                                                                                          | 0.226          | 0.111          | 0.492          |
| 0.348           | 0.186           | 0.533           | AA463631 | signal recognition particle 72kD                                                                                                                         | 0.328          | 0.118          | 0.359          |
| 0.268           | 0.145           | 0.539           | AA045699 | transmembrane 4 superfamily member 3                                                                                                                     | 0.233          | 0.136          | 0.585          |
| 0.110           | 0.059           | 0.541           | R17676   | ubiquinol-cytochrome c reductase hinge protein                                                                                                           | 0.149          | 0.070          | 0.472          |
| 0.065           | 0.036           | 0.545           | H74265   | protein tyrosine phosphatase, receptor type, c polypeptide                                                                                               | 0.113          | 0.037          | 0.325          |
| 0.117           | 0.064           | 0.545           | AA279072 | inositol polyphosphate phosphatase-like 1                                                                                                                | 0.125          | 0.061          | 0.489          |
| 0.186           | 0.102           | 0.547           | H48122   | breast cancer 2, early onset                                                                                                                             | 0.159          | 0.093          | 0.586          |
| 0.192           | 0.105           | 0.547           | AA464544 | LIM domain only 2 (rhombotin-like 1)                                                                                                                     | 0.293          | 0.139          | 0.475          |
| 0.115           | 0.063           | 0.554           | AA047260 | H2A histone family, member O                                                                                                                             | 0.144          | 0.084          | 0.584          |
| 0.070           | 0.039           | 0.555           | H90287   | ubiquitously transcribed tetratricopeptide repeat gene, X chromosome                                                                                     | 0.080          | 0.038          | 0.475          |
| 0.112           | 0.062           | 0.557           | H95633   | crystallin, alpha A                                                                                                                                      | 0.187          | 0.073          | 0.388          |
| 0.112           | 0.062           | 0.557           | H41489   | adaptor-related protein complex 1, beta 1 subunit                                                                                                        | 0.133          | 0.065          | 0.486          |
| 0.076           | 0.042           | 0.558           | H07899   | vascular endothelial growth factor C                                                                                                                     | 0.081          | 0.041          | 0.505          |
| 0.303           | 0.169           | 0.558           | AA054321 | H.sapiens HCG I mRNA                                                                                                                                     | 0.344          | 0.192          | 0.559          |

Table S3, Roth et al. 2002

|       |       |       |          |                                                                                                                                       |       |       |       |
|-------|-------|-------|----------|---------------------------------------------------------------------------------------------------------------------------------------|-------|-------|-------|
| 0.136 | 0.076 | 0.559 | H20743   | cell division cycle 34                                                                                                                | 0.249 | 0.085 | 0.340 |
| 0.220 | 0.123 | 0.560 | N53351   | Ric (Drosophila)-like, expressed in neurons                                                                                           | 0.197 | 0.109 | 0.552 |
| 0.567 | 0.319 | 0.562 | H54289   | Golgi vesicular membrane trafficking protein p18                                                                                      | 0.848 | 0.481 | 0.567 |
| 0.090 | 0.051 | 0.565 | AA088434 | zinc finger protein 38 (KOX 25)                                                                                                       | 0.105 | 0.056 | 0.529 |
| 0.094 | 0.054 | 0.567 | H14359   | E74-like factor 4 (ets domain transcription factor)                                                                                   | 0.100 | 0.058 | 0.578 |
| 0.159 | 0.091 | 0.569 | R48926   | hydroxyacyl-Coenzyme A dehydrogenase/3-ketoacyl-Coenzyme A thiolase/enoyl-Coenzyme A hydratase (trifunctional protein), alpha subunit | 0.199 | 0.102 | 0.512 |
| 0.073 | 0.042 | 0.570 | R89082   | A kinase (PRKA) anchor protein 7                                                                                                      | 0.095 | 0.040 | 0.423 |
| 0.061 | 0.035 | 0.572 | AA070358 | transketolase (Wernicke-Korsakoff syndrome)                                                                                           | 0.093 | 0.034 | 0.363 |
| 0.074 | 0.042 | 0.572 | AA019320 | adducin 2 (beta)                                                                                                                      | 0.089 | 0.046 | 0.514 |
| 0.123 | 0.071 | 0.573 | H05445   | growth associated protein 43                                                                                                          | 0.203 | 0.073 | 0.360 |
| 0.179 | 0.103 | 0.575 | AA598759 | phosphogluconate dehydrogenase                                                                                                        | 0.218 | 0.108 | 0.496 |
| 0.065 | 0.038 | 0.577 | R67376   | pleckstrin homology, Sec7 and coiled/coil domains 3                                                                                   | 0.086 | 0.040 | 0.467 |
| 0.092 | 0.053 | 0.578 | H99736   | chromodomain helicase DNA binding protein 1                                                                                           | 0.124 | 0.051 | 0.409 |
| 0.079 | 0.046 | 0.580 | AA598401 | archain 1                                                                                                                             | 0.103 | 0.046 | 0.443 |
| 0.507 | 0.295 | 0.581 | H05820   | ribosomal protein, mitochondrial, L3                                                                                                  | 0.409 | 0.220 | 0.539 |
| 0.071 | 0.042 | 0.584 | R70488   |                                                                                                                                       | 0.098 | 0.043 | 0.440 |
| 0.075 | 0.044 | 0.584 | AA425853 | splicing factor proline/glutamine rich (polypyrimidine tract-binding protein-associated)                                              | 0.065 | 0.037 | 0.572 |
| 0.424 | 0.732 | 1.727 | AA434144 | claudin 3                                                                                                                             | 0.353 | 0.734 | 2.076 |
| 1.294 | 2.302 | 1.779 | H16958   | glyceraldehyde-3-phosphate dehydrogenase                                                                                              | 0.372 | 0.697 | 1.873 |
| 0.175 | 0.322 | 1.836 | AA496360 | protein kinase C, delta                                                                                                               | 0.215 | 0.388 | 1.805 |
| 1.283 | 2.540 | 1.979 | H16958   | glyceraldehyde-3-phosphate dehydrogenase                                                                                              | 0.403 | 0.786 | 1.952 |
| 0.069 | 0.145 | 2.115 | AA463452 | DiGeorge syndrome critical region gene DGS1                                                                                           | 0.088 | 0.164 | 1.862 |
| 0.161 | 0.378 | 2.348 | R51209   | protein phosphatase 2A, regulatory subunit B' (PR 53)                                                                                 | 0.236 | 0.491 | 2.077 |
| 0.528 | 1.243 | 2.356 | AA481780 | carbonic anhydrase III, muscle specific                                                                                               | 0.208 | 0.411 | 1.977 |
| 0.176 | 0.456 | 2.601 | AA664077 | ATPase, vacuolar, 14 kD                                                                                                               | 0.206 | 0.368 | 1.782 |
