# Supplementary material
Source: PubMed Central journal article supplement (PMC2812433)
Supplement: NIHMS169756-supplement-Suppl_Table_4.pdf [file NIHMS169756-supplement-Suppl_Table_4.pdf]

Table S4, Roth et al. 2002

| Young Men | Older Men | Men Ratio | Acc#     | Gene                                                                                        | Young Women | Older Women |
|-----------|-----------|-----------|----------|---------------------------------------------------------------------------------------------|-------------|-------------|
| 0.552     | 0.245     | 0.444     | R42609   | capping protein (actin filament) muscle Z-line, alpha 2                                     | 1.566       | 0.311       |
| 0.143     | 0.068     | 0.475     | T62060   | antithrombin III                                                                            | 0.150       | 0.076       |
| 0.881     | 0.459     | 0.522     | AA490538 | zinc finger protein homologous to Zfp161 in mouse                                           | 0.487       | 0.164       |
| 0.131     | 0.071     | 0.544     | R54424   | glutamate dehydrogenase 1                                                                   | 0.270       | 0.139       |
| 0.329     | 0.185     | 0.561     | H80712   | caspase 10, apoptosis-related cysteine protease                                             | 0.614       | 0.230       |
| 0.209     | 0.120     | 0.573     | AA877845 | LIM domain kinase 2                                                                         | 0.170       | 0.064       |
| 0.516     | 0.297     | 0.576     | AA451716 | nuclear factor of kappa light polypeptide gene enhancer in B-cells 1 (p105)                 | 0.565       | 0.260       |
| 0.301     | 0.177     | 0.588     | AA598974 | cell division cycle 2, G1 to S and G2 to M                                                  | 0.198       | 0.086       |
| 0.290     | 0.493     | 1.703     | R45413   | sarcoma amplified sequence                                                                  | 0.444       | 1.192       |
| 0.151     | 0.258     | 1.710     | R43766   | eukaryotic translation elongation factor 2                                                  | 0.096       | 0.244       |
| 0.187     | 0.320     | 1.717     | AA773894 | zinc finger protein 43 (HTF6)                                                               | 0.120       | 0.239       |
| 0.096     | 0.167     | 1.734     | R61295   | solute carrier family 25 (mitochondrial carrier; adenine nucleotide translocator), member 6 | 0.081       | 0.150       |
| 0.120     | 0.214     | 1.778     | H90899   | desmoplakin (DPI, DPII)                                                                     | 0.058       | 0.123       |
| 0.082     | 0.146     | 1.786     | AA148548 | fatty acid binding protein 3, muscle and heart (mammary-derived growth inhibitor)           | 0.072       | 0.158       |
| 0.410     | 0.734     | 1.789     | T60048   | actin, gamma 2, smooth muscle, enteric                                                      | 0.110       | 0.434       |
| 0.150     | 0.280     | 1.867     | AA418251 | pleiomorphic adenoma gene 1                                                                 | 0.207       | 0.546       |
| 0.064     | 0.120     | 1.885     | AA026557 | spleen focus forming virus (SFFV) proviral integration oncogene spi1                        | 0.176       | 0.454       |
| 0.185     | 0.352     | 1.903     | R40850   | ARP1 (actin-related protein 1, yeast) homolog A (centractin alpha)                          | 0.109       | 0.366       |
| 0.068     | 0.130     | 1.917     | R92124   | DKFZP586G1122 protein                                                                       | 0.056       | 0.119       |
| 0.064     | 0.127     | 1.992     | AA775874 | ribosomal protein L18                                                                       | 0.068       | 0.142       |
| 0.500     | 0.998     | 1.996     | H84982   | checkpoint suppressor 1                                                                     | 0.682       | 1.507       |
| 0.056     | 0.112     | 2.001     | R15814   | malate dehydrogenase 1, NAD (soluble)                                                       | 0.081       | 0.158       |
| 0.143     | 0.289     | 2.026     | AA496921 | homeo box A9                                                                                | 0.232       | 0.444       |
| 0.063     | 0.130     | 2.055     | H54020   | splicing factor, arginine/serine-rich 7 (35kD)                                              | 0.052       | 0.090       |
| 0.090     | 0.188     | 2.078     | AA598814 | ATPase, Na <sup>+</sup> /K <sup>+</sup> transporting, beta 1 polypeptide                    | 0.077       | 0.130       |
| 0.115     | 0.240     | 2.085     | R45230   | gamma-aminobutyric acid (GABA) A receptor, beta 1                                           | 0.073       | 0.137       |
| 0.322     | 0.701     | 2.176     | AA477400 | tropomyosin 2 (beta)                                                                        | 0.230       | 0.605       |
| 0.118     | 0.257     | 2.187     | T62048   | complement component 1, s subcomponent                                                      | 0.089       | 0.152       |
| 0.048     | 0.110     | 2.291     | AA459308 | Human elastin gene, partial cds and partial 3'UTR                                           | 0.078       | 0.183       |
| 0.061     | 0.139     | 2.297     | H54393   | Opa-interacting protein 5                                                                   | 0.049       | 0.084       |
| 0.095     | 0.225     | 2.370     | AA916325 | aldo-keto reductase family 1, member C3 (3-alpha hydroxysteroid dehydrogenase, type II)     | 0.066       | 0.126       |
| 0.240     | 0.591     | 2.467     | H02243   | homeo box B5                                                                                | 0.215       | 0.596       |
| 0.217     | 0.570     | 2.629     | H37774   | tuberous sclerosis 2                                                                        | 0.220       | 0.847       |
| 0.092     | 0.248     | 2.684     | AA156988 | aconitase 1, soluble                                                                        | 0.106       | 0.194       |
| 0.092     | 0.252     | 2.733     | N64628   | ubiquitin-like 4                                                                            | 0.110       | 0.373       |

Table S4, Roth et al. 2002

| <b>Women Ratio</b> |
|--------------------|
| 0.198              |
| 0.505              |
| 0.337              |
| 0.516              |
| 0.375              |
| 0.377              |
| 0.461              |
| 0.433              |
| 2.684              |
| 2.541              |
| 1.993              |
| 1.845              |
| 2.114              |
| 2.200              |
| 3.939              |
| 2.645              |
| 2.574              |
| 3.352              |
| 2.134              |
| 2.087              |
| 2.209              |
| 1.955              |
| 1.914              |
| 1.716              |
| 1.703              |
| 1.877              |
| 2.633              |
| 1.708              |
| 2.363              |
| 1.735              |
| 1.903              |
| 2.774              |
| 3.848              |
| 1.828              |
| 3.384              |
