# Supplementary material
Source: PubMed Central journal article supplement (PMC2812433)
Supplement: NIHMS169756-supplement-Suppl_Table_5.pdf [file NIHMS169756-supplement-Suppl_Table_5.pdf]

Table S5, Roth et al. 2002

| Before-ST | After-ST | Ratio | Acc#     | Gene                                                                                        |
|-----------|----------|-------|----------|---------------------------------------------------------------------------------------------|
| 1.715     | 0.175    | 0.102 | R68106   | Fc fragment of IgG, low affinity IIb, receptor for (CD32)                                   |
| 1.303     | 0.146    | 0.112 | AA443634 | ubiquitin-conjugating enzyme E2G 2 (homologous to yeast UBC7)                               |
| 1.082     | 0.268    | 0.248 | AA455925 | four and a half LIM domains 1                                                               |
| 1.646     | 0.432    | 0.262 | N78927   | myosin, light polypeptide 2, regulatory, cardiac, slow                                      |
| 0.987     | 0.261    | 0.265 | AA455300 | cold shock domain protein A                                                                 |
| 1.798     | 0.535    | 0.297 | H16958   | glyceraldehyde-3-phosphate dehydrogenase                                                    |
| 1.912     | 0.594    | 0.311 | H16958   | glyceraldehyde-3-phosphate dehydrogenase                                                    |
| 0.885     | 0.310    | 0.350 | AA481780 | carbonic anhydrase III, muscle specific                                                     |
| 0.697     | 0.265    | 0.380 | W58092   | tropomyosin 1 (alpha)                                                                       |
| 0.692     | 0.280    | 0.405 | AA634006 | actin, alpha 2, smooth muscle, aorta                                                        |
| 0.230     | 0.102    | 0.442 | AA192166 | myosin, light polypeptide 3, alkali; ventricular, skeletal, slow                            |
| 0.670     | 0.299    | 0.446 | R44290   | actin, beta                                                                                 |
| 1.537     | 0.698    | 0.454 | AA196393 | Human alkali myosin light chain 3 mRNA, complete cds                                        |
| 0.315     | 0.144    | 0.456 | AA112660 | forkhead box F1                                                                             |
| 0.210     | 0.101    | 0.484 | R43973   | eukaryotic translation elongation factor 1 gamma                                            |
| 0.425     | 0.206    | 0.484 | T61948   | FBJ murine osteosarcoma viral oncogene homolog B                                            |
| 0.173     | 0.084    | 0.489 | N62761   | fragile X mental retardation, autosomal homolog 1                                           |
| 0.149     | 0.075    | 0.503 | AA680322 | NADH dehydrogenase (ubiquinone) 1 alpha subcomplex, 4 (9kD, MLRQ)                           |
| 0.234     | 0.118    | 0.505 | AA708298 | ATP synthase, H <sup>+</sup> transporting, mitochondrial F1 complex, beta polypeptide       |
| 0.421     | 0.214    | 0.508 | AA182848 | troponin I, skeletal, slow                                                                  |
| 0.253     | 0.130    | 0.513 | R40850   | ARP1 (actin-related protein 1, yeast) homolog A (centractin alpha)                          |
| 0.574     | 0.298    | 0.520 | R44290   | actin, beta                                                                                 |
| 0.174     | 0.091    | 0.520 | R43973   | eukaryotic translation elongation factor 1 gamma                                            |
| 0.113     | 0.059    | 0.524 | AA680244 | ribosomal protein L11                                                                       |
| 0.223     | 0.118    | 0.529 | AA126265 | calnexin                                                                                    |
| 0.732     | 0.400    | 0.547 | R60160   | topoisomerase (DNA) I                                                                       |
| 0.172     | 0.094    | 0.548 | AA599175 | nuclease sensitive element binding protein 1                                                |
| 0.593     | 0.328    | 0.554 | R52541   | EST                                                                                         |
| 0.140     | 0.078    | 0.556 | AA045508 | adenylyl cyclase-associated protein 2                                                       |
| 0.294     | 0.165    | 0.559 | W93500   | potassium voltage-gated channel, KQT-like subfamily, member 1                               |
| 0.210     | 0.118    | 0.562 | T67270   | EST                                                                                         |
| 0.516     | 0.291    | 0.565 | AA428058 | NADH dehydrogenase (ubiquinone) 1 beta subcomplex, 7 (18kD, B18)                            |
| 0.406     | 0.230    | 0.567 | H64325   | son of sevenless (Drosophila) homolog 1                                                     |
| 0.465     | 0.264    | 0.567 | AA477400 | tropomyosin 2 (beta)                                                                        |
| 0.203     | 0.115    | 0.569 | AA634008 | ribosomal protein S23                                                                       |
| 0.283     | 0.161    | 0.571 | H88599   | predicted osteoblast protein                                                                |
| 0.573     | 0.327    | 0.571 | AA868929 | troponin T1, skeletal, slow                                                                 |
| 0.700     | 0.400    | 0.571 | AA176957 | nebulin                                                                                     |
| 15.151    | 8.733    | 0.576 | AA872001 | annexin A6                                                                                  |
| 0.123     | 0.071    | 0.579 | AA044059 | voltage-dependent anion channel 1                                                           |
| 0.135     | 0.078    | 0.579 | H85355   | ATPase, Ca <sup>++</sup> transporting, cardiac muscle, slow twitch 2                        |
| 0.219     | 0.127    | 0.579 | AA453766 | CASP8 and FADD-like apoptosis regulator                                                     |
| 3.721     | 2.163    | 0.581 | R33154   | EST                                                                                         |
| 0.223     | 0.130    | 0.583 | R53942   | solute carrier family 25 (mitochondrial carrier; adenine nucleotide translocator), member 4 |

Table S5, Roth et al. 2002

|       |       |       |          |                                                                                           |
|-------|-------|-------|----------|-------------------------------------------------------------------------------------------|
| 1.261 | 0.736 | 0.584 | T94169   | mitogen-activated protein kinase 8                                                        |
| 0.422 | 0.249 | 0.589 | T60048   | actin, gamma 2, smooth muscle, enteric                                                    |
| 3.666 | 2.162 | 0.590 | AA176581 | myoglobin                                                                                 |
| 0.054 | 0.092 | 1.704 | N54165   | defensin, alpha 1, myeloid-related sequence                                               |
| 0.195 | 0.333 | 1.705 | AA400474 | ESTs, Highly similar to zona-pellucida-binding protein [H.sapiens]                        |
| 0.055 | 0.094 | 1.706 | AA083478 | stimulated trans-acting factor (50 kDa)                                                   |
| 1.410 | 2.406 | 1.707 | R43325   | death associated protein 3                                                                |
| 0.042 | 0.072 | 1.709 | AA219045 | microtubule-associated protein 1B                                                         |
| 0.100 | 0.171 | 1.712 | AA126009 | FXVD domain-containing ion transport regulator 3                                          |
| 0.071 | 0.121 | 1.714 | AA418077 | GTP-binding protein overexpressed in skeletal muscle                                      |
| 0.117 | 0.201 | 1.721 | AA620553 | flap structure-specific endonuclease 1                                                    |
| 0.060 | 0.103 | 1.731 | H65034   | EST                                                                                       |
| 0.048 | 0.083 | 1.742 | AA678295 | BRCA1 associated RING domain 1                                                            |
| 3.610 | 6.440 | 1.784 | AA099394 | signal sequence receptor, alpha (translocon-associated protein alpha)                     |
| 0.046 | 0.083 | 1.801 | AA464267 | Bicaudal D (Drosophila) homolog 1                                                         |
| 0.044 | 0.081 | 1.852 | AA456295 | TNF receptor-associated factor 6                                                          |
| 0.041 | 0.076 | 1.864 | AA488366 | transcription factor 12 (HTF4, helix-loop-helix transcription factors 4)                  |
| 0.095 | 0.182 | 1.909 | AA496359 | immediate early protein                                                                   |
| 0.083 | 0.160 | 1.923 | AA159359 | dystrobrevin, beta                                                                        |
| 0.040 | 0.078 | 1.943 | H61188   | EST                                                                                       |
| 0.064 | 0.125 | 1.950 | R32756   | Ewing sarcoma breakpoint region 1                                                         |
| 0.102 | 0.206 | 2.011 | R45264   | proteolipid protein 1 (Pelizaeus-Merzbacher disease, spastic paraplegia 2, uncomplicated) |
| 0.117 | 0.249 | 2.131 | AA464601 | tetraspan 5                                                                               |
| 0.171 | 0.371 | 2.175 | N92901   | fatty acid binding protein 4, adipocyte                                                   |
| 0.155 | 0.378 | 2.438 | AA291749 | estrogen receptor 1                                                                       |
